1           **Title: Testing and Validation of Reciprocating Positive Displacement Pump for**  
2 **Benchtop Pulsating Flow Model of Cerebrospinal Fluid Production and Other Physiologic**  
3 **Systems**

4  
5 **Authors: Ahmad Faryami<sup>1</sup>, Adam Menkara<sup>1</sup>, Daniel Viar<sup>2</sup>, Dr. Carolyn A Harris<sup>3</sup>**

6     1       Department of Biomedical Engineering, Wayne State University, Detroit, MI 48202

7     2       Department of Computer Science and Engineering, University of Toledo, Toledo, Ohio,  
8       43606

9     3       Carolyn A Harris, Ph.D. (corresponding author), Wayne State University Dept. of  
10       Chemical Engineering and Materials Science, 6135 Woodward Avenue, Rm 3120,  
11       Detroit, MI 48202

## 12 **Abstract**

13 Background: The flow of physiologic fluids through organs and organs systems is an integral  
14 component of their function. The complex fluid dynamics in many organ systems are still not  
15 completely understood, and in-vivo measurements of flow rates and pressure provide a testament  
16 to the complexity of each flow system. Variability in in-vivo measurements and the lack of  
17 control over flow characteristics leave a lot to be desired for testing and evaluation of current  
18 modes of treatments as well as future innovations. In-vitro models are particularly ideal for  
19 studying neurological conditions such as hydrocephalus due to their complex pathophysiology  
20 and interactions with therapeutic measures. The following aims to present the reciprocating  
21 positive displacement pump, capable of inducing pulsating flow of a defined volume at a  
22 controlled beat rate and amplitude. While the other fluidic applications of the pump are currently  
23 under investigation, this study was focused on simulating the pulsating cerebrospinal fluid  
24 production across profiles with varying parameters.

25 Methods: Pumps were manufactured using 3D printed and injection molded parts. The pumps  
26 were powered by an Arduino-based board and proprietary software that controls the linear  
27 motion of the pumps to achieve the specified output rate at the desired pulsation rate and  
28 amplitude. A range of  $0.01 \frac{ml}{min}$  to  $0.7 \frac{ml}{min}$  was tested to evaluate the versatility of the pumps. The  
29 accuracy and precision of the pumps' output were evaluated by obtaining a total of 150 one-  
30 minute weight measurements of degassed deionized water per output rate across 15 pump  
31 channels. In addition, nine experiments were performed to evaluate the pumps' control over  
32 pulsation rate and amplitude.

33 Results: volumetric analysis of a total of 1200 readings determined that the pumps achieved the  
34 target output volume rate with a mean absolute error of  $-0.001034283 \frac{ml}{min}$  across the specified  
35 domain. It was also determined that the pumps can maintain pulsatile flow at a user-specified beat rate  
36 and amplitude.

37 Conclusion: The validation of this reciprocating positive displacement pump system allows for  
38 the future validation of novel designs to components used to treat hydrocephalus and other  
39 physiologic models involving pulsatile flow. Based on the promising results of these experiments  
40 at simulating pulsatile CSF flow, a benchtop model of human CSF production and distribution  
41 could be achieved through the incorporation of a chamber system and a compliance component.

42

## 43 **Keywords**

44 Hydrocephalus, In vitro modeling, Cerebrospinal fluid flow pattern, CSF dynamics, Microfluidic  
45 pump, CSF amplitude

## 46 **Background**

47 Hydrocephalus describes a variety of conditions often presented with similar clinical symptoms.  
48 The classic presentation of hydrocephalus involves elevated intracranial pressure (ICP) which  
49 manifests with clinical symptoms such as severe headaches, visual problems, vomiting, loss of  
50 consciousness, and in extreme cases if left untreated, coma and death. Although the first  
51 experimental studies on hydrocephalus were conducted more than a century ago, the underlying  
52 mechanisms are still an active area of research [1–4].

53 Cerebrospinal fluid (CSF) is a blood filtrate and is 99% composed of water. CSF also contains  
54 important serum proteins such as fibrin, fibrinogen, IgG, and albumin [5]. Other than sharing  
55 biochemistry with the cerebral vasculature, flow-sensitive magnetic resonance imaging has  
56 demonstrated that CSF flow within the ventricles follows similar pulsatile flow dynamics. It is  
57 also hypothesized that an increase in intraventricular pulsations occurs as the result of changes in  
58 intracranial compliance. Many factors have been suggested to have an impact on intracranial  
59 compliance, which also determines ICP dynamics in the patient cranium [6–8].

60 While overproduction of CSF may result in an increase in ICP and hydrocephalus manifestation,  
61 reduction or obstruction in CSF removal and reabsorption hydrocephalus is another common  
62 pathway for the pathologic manifestation[2,4]. Another imperative difference between  
63 hydrocephalus patients is the length of time for hydrocephalus to develop and appear clinically.  
64 The clinical appearance of hydrocephalus is easily apparent in neonatal patients which involve a  
65 precipitous increase in head circumference while the pathology of hydrocephalus might take  
66 significantly longer to appear in adult patients. In some instances, the gradual progression of the  
67 disease allows that the intracranial compliance to adapt to the underlying causes of  
68 hydrocephalus rendering no clinical presentations, symptoms, or high ICP for a long time which  
69 may present clinically later in the patients' life [9–11]. Recent studies indicate that idiopathic  
70 normal pressure hydrocephalus might be more common than it was previously supposed: new  
71 evidence suggests it appears in 5.9% of individuals older than 80 years. Studies also suggest that  
72 normal pressure hydrocephalus is underdiagnosed and undertreated due to its pathophysiology  
73 that might expand over a few decades with similarities to diseases such as Alzheimer's and  
74 dementia. It is estimated that 3.4 per 100,000 adults undergo a surgical procedure for

75 hydrocephalus with normal pressure hydrocephalus, high-pressure hydrocephalus, and aqueduct  
76 stenosis accounting for 47, 27, and 15 percent of the patients respectively [12].

77 Shunt insertion is currently the most prevalent mode of treatment for the hydrocephalic  
78 patient[13]. Nearly all patients, 98 percent, that received shunt placement therapy will experience  
79 shunt failure which involves subsequent revision surgeries, incurring up to 1\$ billion in cost for  
80 hydrocephalus care [14]. Therefore, hydrocephalus diagnosis and estimation of shunt success  
81 rate for patients are among the most prolific fields of study. Flow sensitive magnetic resonance  
82 imaging is one of the diagnostic tools that has been utilized to diagnose and evaluate shunt  
83 success rates in patients. However, some of these methods are less accurate across various  
84 patient cohorts. In situ, Magnetic Resonance (MR) measurements are resource and time-  
85 intensive [15–17]. Furthermore, certain shunt systems have limited MR compatibility that could  
86 further restrict access to post-surgery MR measurements.

87 Alternatively, animal studies are often used to investigate CSF dynamics and to provide insights  
88 into the healthy and pathological conditions of living organisms. However, limitations of in-vivo  
89 measurements, dramatic differences between humans and animals, and the lack of control over  
90 flow dynamics leave a clear need for testing and evaluation of current modes of treatments [18].  
91 Furthermore, simulating CSF production rate, pulsations and amplitudes might provide valuable  
92 insights into the healthy and diseased states with significant diagnostic potential.

93 Due to its unique anatomy and function, up to 15 percent of the cardiac output is supplied to the  
94 brain during the systole cycle and cranial blood flow and CSF are closely associated [19].

95 Particle tracing also demonstrated that the fluid dynamics and interactions between the  
96 microvasculature and CSF spaces are complex and region-specific [20]. One of the advantages of  
97 this pump is the capability to induce microfluidic flow rates at the physiologic beat rate and  
98 amplitude directly, negating the need to modify the system or fluid pathway to achieve a variety  
99 of flow patterns.

100 The main challenge of studying the fluid dynamics of hydrocephalus in a benchtop model is the  
101 complex and diverse pathology of the underlying causes that present similar clinical symptoms.  
102 Therefore, the pump must be capable of inducing pulsatile flow over a range of flow rates with  
103 accurate control over beat rate and amplitude.

## 104 **Materials and Methods**

### 105 **Reciprocating Positive Displacement Pump**

106 Pumps are comprised of five syringes, 3D printed parts, a stepper motor, a stepper motor  
107 coupler, a lead screw, linear bearings, and a series of check valves. Figure 2 illustrates a fully  
108 assembled pump. Flow into and out of the syringes is through silicone tubes. Luer taper fittings  
109 were used to establish fluid connections between all the components. The 3D printed parts were  
110 manufactured using Anycubic I3 Mega printer using polylactic acid plastic (Anycubic  
111 Technology CO., Limited, HongKong). The stepper motor, the motor coupler, and the lead screw  
112 (composing a “drive unit”) are controlled by an Arduino-based board connected to a computer  
113 with proprietary custom-built software built using Python that determines the rotation duration  
114 and speed depending on the user-specified profile.

115 A user interface was developed to improve the user experience such that the pump output bulk  
116 volume rate, beat rate, and amplitude can be easily input and modified as a function of time. The  
117 rotational motion of the stepper motor is converted into linear actuation via the lead screw and  
118 linear rods and bearings. A series of check-valves are placed immediately after the syringes to  
119 allow exact volume output on the forward stroke and automatic refill on the backward motion.  
120 Each board has a capacity for up to three separate pumps for a total of fifteen channels per  
121 device.

122 Previously, peristaltic pumps were used to induce pulsating flow for bioreactor applications.  
123 Operators such as Flow Limiting Operator were able to successfully control the peristaltic pump  
124 output by controlling the motor rotations per minute. Inherently, peristaltic pump output and  
125 pulse rate are locked together with dependence on tubing diameter [21]. One of the main  
126 enhancements of this pump over previous designs is its capability to maintain a constant volume  
127 rate at various beat rates and amplitude.

### 128 **Data Acquisition**

129 Flow patterns were obtained using six Sensirion SLF04 and SLF06 series flow sensors  
130 (Sensirion AG, Switzerland). The flow data were acquired using Sensirion USB Sensor Viewer  
131 software on a Hewlett-Packard desktop computer running Windows 10Pro operating system. The  
132 flow sensors were placed immediately after the output check valve to measure the pump output

133 directly. The amplitude and beat rates were measured using the flow sensors across six separate  
134 channels, two channels per pump. While each pump is comprised of five syringes that are  
135 mounted on the same linear actuator, the flow through each channel was individually recorded  
136 and analyzed to ensure a consistent flow pattern and output through the channels on the same  
137 pump and across all three pumps connected to the same device.

### 138 **Volumetric Analysis**

139 Although the physiologic rate of CSF production and absorption is still an active area of  
140 research,  $0.3 \frac{ml}{min}$  is currently accepted as the average or near average CSF production rate in a  
141 healthy adult human. A range of  $0.01 \frac{ml}{min}$  to  $0.7 \frac{ml}{min}$  was tested to evaluate the versatility of the  
142 pumps. An arbitrary systole time of 0.3 seconds and a pulsation rate of 100 beats per minute  
143 were chosen for these experiments. The accuracy and precision of the pumps' output were  
144 evaluated by obtaining a total of 150, one-minute weight measurements of degassed, deionized  
145 water across 15 pump channels per volume profile. The density of deionized water was measured  
146 and verified before the experiment at 1 gram per 1 milliliter of water at room temperature using a  
147 graduated beaker and an analytical balance. A Mettler Toledo AT261 DeltaRange Analytical  
148 Balance (Mettler-Toledo, LLC, USA) and Ae Adam Analytical Balance Model AAA 160DL  
149 (Adam Equipment Inc, USA) were used for all weight measurements. The flow of information  
150 between various components of the system relative to the unidirectional fluidic flow from source  
151 to output collection beakers is summarized in Figure 1. To evaluate the volumetric consistency  
152 of the pump output, the pumps were set using the user interface to run each volume rate for 10  
153 consecutive minutes. The output of each channel was collected and weighed in individual  
154 beakers. The pumps were properly cleaned and primed using the built-in feature within the user  
155 interface before the experiments.

### 156 **Amplitude**

157 Due to its implications in diagnostic and clinical applications, peak amplitude remains an  
158 important variable that was incorporated into the benchtop model. While the pump net output  
159 was solely a function of the distance the plungers were pushed forward, the amplitude of each  
160 beat was a multifactorial variable that was a function of pumps' volume rate, beat rate, and the  
161 time required for a beat to be completed, analogous to systole time during a regular heart cycle.

162 The amplitude of individual beats was a function of the three variables independently specified  
163 within the user interface. According to Equation 1, the amplitude is inversely correlated to  
164 systole time and beat rate, while it is directly correlated to pump output volume rate. The  
165 dampening factor is a function of the overall compliance and material properties of all the  
166 components within the fluidic circuit including syringes, silicone tubes, and valves.

$$167 \quad \blacktriangleright \text{Amplitude} \left( \frac{ml}{min} \right) = \frac{\text{Volume rate} \left( \frac{ml}{min} \right) \times 60}{\text{Systole time (seconds)} \times \text{Heart rate} \left( \frac{Beats}{min} \right)} \times \text{Dampening Factor}$$

### 168 **Systole Time**

169 Systole time is also an important variable within the domains of diagnostic and clinical  
170 applications. Systole time in the benchtop model was representative of the total duration of  
171 motor output, or the length of time the motor was in motion analogous to ventricular systole  
172 during a regular cardiac cycle. The incorporation of this variable into the benchtop model  
173 allowed for accurate control throughout the beat cycle length and inherently, the amplitude  
174 characteristics of a certain inputted profile. The manipulation of this variable across different  
175 flow profiles did not change the output volume of the profile, because this variable is an operator  
176 in the time domain and not in the volumetric output domain. Beat cycle duration was the total  
177 length of time for a complete beat cycle which was ideally equal to twice the specified systole  
178 time in a setup with no compliance. However, the compliance of silicone tubing, check valves,  
179 and residual air bubbles may have an impact on the beat cycle duration.

$$180 \quad \blacktriangleright \text{Beat Cycle Duration (seconds)} \cong 2 \times \text{Systole time (seconds)}$$

181

### 182 **Tubing and Valve System**

183 One of the main considerations in the early stages of the development of the pump was its  
184 compatibility with in-vitro bioreactor projects that often require more separate channels to  
185 eliminate cross-contamination between individual samples. Therefore, each channel has a  
186 separate input and output 50 cm 3mm inner diameter silicone tube. Two check valves are  
187 implemented per channel to allow the syringes to prime and refill automatically. The mechanical  
188 inefficiencies of the system were also accounted for within the controlling program. The check

189 valves are also useful in the automatic sterilization process of the pump and tubing system using  
190 built-in 20-minute rinse cycles with 99% isopropyl alcohol followed by three deionized water  
191 cycles to remove the remaining isopropyl alcohol from the system. Figure 2 shows the pumps  
192 from various angles with the CAD models appearing on the left and the assembled pump on the  
193 right

## 194 **Results**

195 The pumps' minimum and maximum output volume rate, beats, and amplitude limits were  
196 determined through trial and error. The optimal domain of operation for the pumps is  
197 summarized in Table 1. The accepted physiologic range for each category is included to illustrate  
198 that the non-pathologic human CSF production falls within the pumps' optimal operation range.  
199 It is noteworthy to mention that the mechanical and software limits of the setup were not reached  
200 during these experiments. However, the reported values in Table 1 correspond to the domain at  
201 which the pumps were at peak performance.

## 202 **Volumetric Analysis**

203 The mean of 10 1-minute measurements across all fifteen channels for each specified volume  
204 rate is reported in Table 2. The highest and the lowest recorded values are also specified as well  
205 as the mean absolute error (MAE), in  $\frac{ml}{min}$  and the mean relative error in percentage. The  
206 measured mean of each output volume rate relative to the specified input is visually represented  
207 in Figure 3. The linear regression function with an  $R^2$  value of 0.9998 also indicates the accuracy  
208 and precision of the pumps over the optimal domain of operation, 0.01 to  $0.7 \frac{ml}{min}$  range.

## 209 **Independent Variables**

210 A series of tests were performed to validate the pulsatile pump output including the nine  
211 experiments depicted in Figures 4,5,6. The flow patterns were collected across 6 channels using  
212 Sensirion liquid flow sensors. On the left, the figures illustrate the pump output in 20-second  
213 segments while running at different user-specified variables, included below each set of figures.  
214 A zoomed-in 1-second interval to better illustrates the unique pattern of individual beats.



215 In the first set of flow patterns, shown in Figure 4, the beat rate and systole time remain constant  
216 at  $70\left(\frac{\text{Beats}}{\text{min}}\right)$  and 0.1 seconds while the output volume rate varies between 0.35, 0.1,  $0.8\frac{\text{ml}}{\text{min}}$ .

217 These results indicate that the pumps are capable of variable output regardless of beat rate or  
218 systole time.

219 In Figure 5, systole time and output volume rates remained constant at 0.1 seconds and  $0.3\frac{\text{ml}}{\text{min}}$   
220 while the beat rate changed from  $20\left(\frac{\text{Beats}}{\text{min}}\right)$  to  $130\left(\frac{\text{Beats}}{\text{min}}\right)$  and  $200\left(\frac{\text{Beats}}{\text{min}}\right)$ . The number of  
221 individual peaks in each 20-second segment in Figures correctly corresponds to the specified  
222 beat rate.

223 Finally, in Figure 6, the beat rate is maintained at  $70\left(\frac{\text{Beats}}{\text{min}}\right)$  and the output volume rate remain  
224 constant at  $0.3\frac{\text{ml}}{\text{min}}$  while systole time varies from 0.05 to 0.1 and 0.3 seconds. As illustrated in  
225 Figures 2 and Figure 4, the pump can maintain a specified beat rate independent of systole time  
226 and volume rate.

## 227 **Discussion**

228 Using the data acquisition system described earlier, sample flow rates were collected over 20-  
229 second intervals to demonstrate the pumps' capabilities in recreating pulsatile flow at  
230 physiologically accurate CSF production rates. Variation testing across the three input  
231 parameters used to define CSF production rate, those being volume rate, heart rate, and systole  
232 time, was also performed to demonstrate the effect of these variables on the subsequent flow  
233 pattern. Because of the dampening effects of the tubing and valve system, amplitudes of these  
234 flow patterns are reduced across the range of the 20-second interval. Furthermore, zooming in on  
235 an individual pulse during the 20-second interval, it is evident that the pump induces an initial  
236 rise in flow rate typical to flow patterns recorded during a normal cardiac cycle, followed by a  
237 constant reduction in flow rate leading up to the next pulse in the profile.

238 For this study, a consistent silicone tubing setup described earlier was used throughout the  
239 testing. The manipulation of this tubing set up in the future and in turn, the dampening factor  
240 applied across the individual channels of the pump as well as the pump will not only manipulate  
241 the amplitude of each beat within the profile as described by Equation 1 but can also affect the  
242 minor spike found on the downward stroke of each beat cycle.

243 The emphasis on the manipulation of the controllable variables of the pump is essential to the  
244 success of the pump across many disciplines where accurate tabletop recreations of flow rates  
245 and patterns are currently a limiting factor. Specifically for hydrocephalus, the instances  
246 presented here recreate the physiologic flow rates and patterns for CSF production which is  
247 particularly important as control groups to be compared to the clinical state in future studies.

248 It has been reported that the fluid dynamics of CSF production and absorption are influenced by  
249 a broad spectrum of factors such as the individuals' unique anatomy and physical characteristics  
250 as well as real-time physiologic conditions such as blood pressure and heart rate [22–25].

251 Furthermore, the input from the central nervous system adds another layer of complexity and  
252 variability in CSF dynamics. Therefore, optimal operation over a reasonable range relative to the  
253 physiologic conditions was one of the main objectives in the design and development of this  
254 device. One of the main advantages of this device over previous models is flexibility in the  
255 domain of operation (Table 3). A mean CSF production rate of  $0.34 \pm 0.13 \frac{ml}{min}$  was reported by  
256 Edsbagge et. al [26]. Profiles at average physiologic heart rate and systole time were used to test  
257 the capabilities of the pump recreating the mean reported CSF production rate along with the  
258 upper and lower limits of the mean. The domain shown within Table 3 for physiologic CSF  
259 production rate has shown to be accurate across its range.

260 The validation of this tabletop model specifically for the use in isolated anatomical subdivisions  
261 of human production and absorption system of CSF is limited because of the current difficulties  
262 in measuring ICP and CSF flow. However, because of the modular tubing setup of the system,  
263 additions to the tube setup in series allow for the easy testing of future components essential to  
264 the modern treatment of hydrocephalus and other domains of research such as catheters and  
265 valves. The scale of the pump and tubes along with the incorporation of other components such  
266 as bioreactor chambers make it a much simpler system to work with within a sterile environment  
267 where an incubator and live cells are involved. Furthermore, it has been reported that compliance  
268 may have a major physiologic function in CSF flow characteristics and distribution [19,27].

269 Therefore, future studies will also investigate the addition of compliance components to the  
270 pump. This study demonstrated that this setup could maintain a CSF production rate, beat rate,  
271 and systole time profile for an extended period over 15 channels. However, these variables all  
272 change throughout the day not only in hydrocephalic patients but in healthy individuals as well

273 [28–30]. Future iterations of the pump and the controlling program can integrate a system where  
274 patient data can be recreated across a full day. The implications of a system like this could alter  
275 the perspectives of researchers within this field and other fields where this pump is applicable,  
276 where an all-encompassing system may be the new standard in terms of accurate in-vitro testing.

277

## 278 **Conclusion**

279 In conclusion, the validation of this reciprocating positive displacement pump system allows for  
280 the future validation of novel designs to biomaterials and devices used in the treatment of  
281 hydrocephalus. Specifically, the use of this system includes major components such as a  
282 hydrocephalus catheter and chamber capable of accurately reflecting changes in ventricular  
283 expansion, as well as a hydrocephalus valve used to regulate the flow of CSF.

284

## 285 **Declarations**

286 **Funding:** Research reported in this publication was supported by *the National Institute of*  
287 *Neurological Disorders and Stroke of the National Institutes of Health* under award  
288 number R01NS094570. Approximately 60% of this project was financed with federal dollars.  
289 The content is solely the responsibility of the authors and does not necessarily represent the  
290 official views of the National Institutes of Health.

291

292 **Authors' Contributions:**

293 JG: Conceptualization, Methodology, Formal analysis, Investigation, Data curation, Project  
294 administration, Writing—original draft, Visualization, and Writing—review & editing.

## 295 **Acknowledgments**

296

297

298

## 299 **References**

- 300 1. Orešković D, Klarica M. The formation of cerebrospinal fluid: Nearly a hundred years of  
301 interpretations and misinterpretations. *Brain Res Rev.* 2010;64: 241–262.  
302 doi:10.1016/j.brainresrev.2010.04.006
- 303 2. Khan MU, Khan B, Ullah W, Ullah A, Ali M. Hydrocephalus: Causes of Hydrocephalus  
304 Among Different Age Groups. *Prof Med J.* 2018;25: 1041–1045.  
305 doi:10.29309/TPMJ/18.4481
- 306 3. Browd SR, Ragel BT, Gottfried ON, Kestle JRW. Failure of cerebrospinal fluid shunts:  
307 Part I: Obstruction and mechanical failure. *Pediatr Neurol.* 2006;34: 83–92.  
308 doi:10.1016/j.pediatrneurol.2005.05.020
- 309 4. Shakeri M, Vahedi P, Lotfinia I. A Review of Hydrocephalus. *Neurosurg Q.* 2008;18:  
310 216–220. doi:10.1097/wnq.0b013e31817328c9
- 311 5. Achyuta AKH, Stephens KD, Lewis HGP, Murthy SK. Mitigation of reactive human cell  
312 adhesion on poly(dimethylsiloxane) by immobilized trypsin. *Langmuir.* 2010;26: 4160–  
313 4167. doi:10.1021/la903441u
- 314 6. Greitz D. Radiological assessment of hydrocephalus: New theories and implications for  
315 therapy. *Neurosurg Rev.* 2004;27: 145–165. doi:10.1007/s10143-004-0326-9
- 316 7. Khasawneh AH, Alexandra PC, Zajciw PA, Harris CA. intracranial pressure -  
317 cerebrospinal fluid production relationships in experimental hydrocephalus. 2020.  
318 doi:10.4103/bc.bc
- 319 8. Doron O, Zadka Y, Barnea O, Rosenthal G. Interactions of brain, blood, and CSF: a novel  
320 mathematical model of cerebral edema. *Fluids Barriers CNS.* 2021;18: 1–14.  
321 doi:10.1186/s12987-021-00274-z
- 322 9. Ringstad G, Vatnehol SAS, Eide PK. Glymphatic MRI in idiopathic normal pressure  
323 hydrocephalus. *Brain.* 2017;140: 2691–2705. doi:10.1093/brain/awx191
- 324 10. Qvarlander S, Lundkvist B, Koskinen LOD, Malm J, Eklund A. Pulsatility in CSF  
325 dynamics: Pathophysiology of idiopathic normal pressure hydrocephalus. *J Neurol*

- 326 Neurosurg Psychiatry. 2013;84: 735–741. doi:10.1136/jnnp-2012-302924
- 327 11. Román GC, Verma AK, Zhang YJ, Fung SH. Idiopathic normal-pressure hydrocephalus  
328 and obstructive sleep apnea are frequently associated: A prospective cohort study. J  
329 Neurol Sci. 2018;395: 164–168. doi:10.1016/j.jns.2018.10.005
- 330 12. Jaraj D, Agerskov S, Rabiei K, Marlow T, Jensen C, Guo X, et al. Vascular factors in  
331 suspected normal pressure hydrocephalus. Neurology. 2016;86: 592–599.  
332 doi:10.1212/WNL.0000000000002369
- 333 13. Enchev Y, Oi S. Historical trends of neuroendoscopic surgical techniques in the treatment  
334 of hydrocephalus. Neurosurg Rev. 2008;31: 249–262. doi:10.1007/s10143-008-0131-y
- 335 14. Harris C, Pearson K, Hadley K, Zhu S, Browd S, Hanak BW, et al. Fabrication of three-  
336 dimensional hydrogel scaffolds for modeling shunt failure by tissue obstruction in  
337 hydrocephalus. Fluids Barriers CNS. 2015;12: 1–16. doi:10.1186/s12987-015-0023-9
- 338 15. Mohammad SA, Osman NM, Ahmed KA. The value of CSF flow studies in the  
339 management of CSF disorders in children: a pictorial review. Insights Imaging. 2019;10.  
340 doi:10.1186/s13244-019-0686-x
- 341 16. Ziegelitz D, Starck G, Kristiansen D, Jakobsson M, Hultenmo M, Mikkelsen IK, et al.  
342 Cerebral perfusion measured by dynamic susceptibility contrast MRI is reduced in  
343 patients with idiopathic normal pressure hydrocephalus. J Magn Reson Imaging. 2014;39:  
344 1533–1542. doi:10.1002/jmri.24292
- 345 17. McCoy MR, Klausner F, Weymayr F, Georg L, Broussalis E, Golaszewski SM, et al.  
346 Aqueductal flow of cerebrospinal fluid (CSF) and anatomical configuration of the cerebral  
347 aqueduct (AC) in patients with communicating hydrocephalus - The trumpet sign. Eur J  
348 Radiol. 2013;82: 664–670. doi:10.1016/j.ejrad.2012.11.032
- 349 18. McAllister JP, Talcott MR, Isaacs AM, Zwick SH, Garcia-Bonilla M, Castaneyra-Ruiz L,  
350 et al. A novel model of acquired hydrocephalus for evaluation of neurosurgical treatments.  
351 Fluids Barriers CNS. 2021;18: 1–18. doi:10.1186/s12987-021-00281-0
- 352 19. Benninghaus A, Balédent O, Lokossou A, Castelar C, Leonhardt S, Radermacher K.  
353 Enhanced in vitro model of the CSF dynamics. Fluids Barriers CNS. 2019;16: 1–11.

- 354           doi:10.1186/s12987-019-0131-z
- 355   20.   Mestre H, Tithof J, Du T, Song W, Peng W, Sweeney AM, et al. Flow of cerebrospinal  
356       fluid is driven by arterial pulsations and is reduced in hypertension. *Nat Commun.* 2018;9.  
357       doi:10.1038/s41467-018-07318-3
- 358   21.   Horbatiuk J, Alazzawi L, Harris CA. The flow limiting operator: A new approach to  
359       environmental control in flow bioreactors. *RSC Adv.* 2020;10: 31056–31064.  
360       doi:10.1039/d0ra05128d
- 361   22.   Martin BA, Loth F. The influence of coughing on cerebrospinal fluid pressure in an in  
362       vitro syringomyelia model with spinal subarachnoid space stenosis. *Cerebrospinal Fluid*  
363       *Res.* 2009;6: 1–18. doi:10.1186/1743-8454-6-17
- 364   23.   Devathasan D, Bentley RT, Enriquez A, Yang Q, Thomovsky SA, Thompson C, et al.  
365       Development of an In Vitro Hemorrhagic Hydrocephalus Model for Functional Evaluation  
366       of Magnetic Microactuators Against Shunt Obstructions. *World Neurosurg.* 2021;155:  
367       e294–e300. doi:10.1016/j.wneu.2021.08.048
- 368   24.   Bateman GA, Levi CR, Schofield P, Wang Y, Lovett EC. The venous manifestations of  
369       pulse wave encephalopathy: Windkessel dysfunction in normal aging and senile dementia.  
370       *Neuroradiology.* 2008;50: 491–497. doi:10.1007/s00234-008-0374-x
- 371   25.   Hladky SB, Barrand MA. Mechanisms of fluid movement into, through and out of the  
372       brain: Evaluation of the evidence. *Fluids Barriers CNS.* 2014;11: 1–32. doi:10.1186/2045-  
373       8118-11-26
- 374   26.   Edsbagge M, Tisell M, Jacobsson L, Wikkelso C. Spinal CSF absorption in healthy  
375       individuals. *Am J Physiol - Regul Integr Comp Physiol.* 2004;287: 1450–1455.  
376       doi:10.1152/ajpregu.00215.2004
- 377   27.   Gholampour S, Bahmani M. Hydrodynamic comparison of shunt and endoscopic third  
378       ventriculostomy in adult hydrocephalus using in vitro models and fluid-structure  
379       interaction simulation. *Comput Methods Programs Biomed.* 2021;204: 106049.  
380       doi:10.1016/j.cmpb.2021.106049
- 381   28.   Loth F, Yardimci MA, Alperin N. Hydrodynamic modeling of cerebrospinal fluid motion

- 382 within the spinal cavity. *J Biomech Eng.* 2001;123: 71–79. doi:10.1115/1.1336144
- 383 29. Stoquart-ElSankari S, Balédent O, Gondry-Jouet C, Makki M, Godefroy O, Meyer ME.  
384 Aging effects on cerebral blood and cerebrospinal fluid flows. *J Cereb Blood Flow Metab.*  
385 2007;27: 1563–1572. doi:10.1038/sj.jcbfm.9600462
- 386 30. Wilkie KP, Drapaca CS, Sivaloganathan S. A nonlinear viscoelastic fractional derivative  
387 model of infant hydrocephalus. *Appl Math Comput.* 2011;217: 8693–8704.  
388 doi:10.1016/j.amc.2011.03.115

389

390

391

392

393

394

395

396

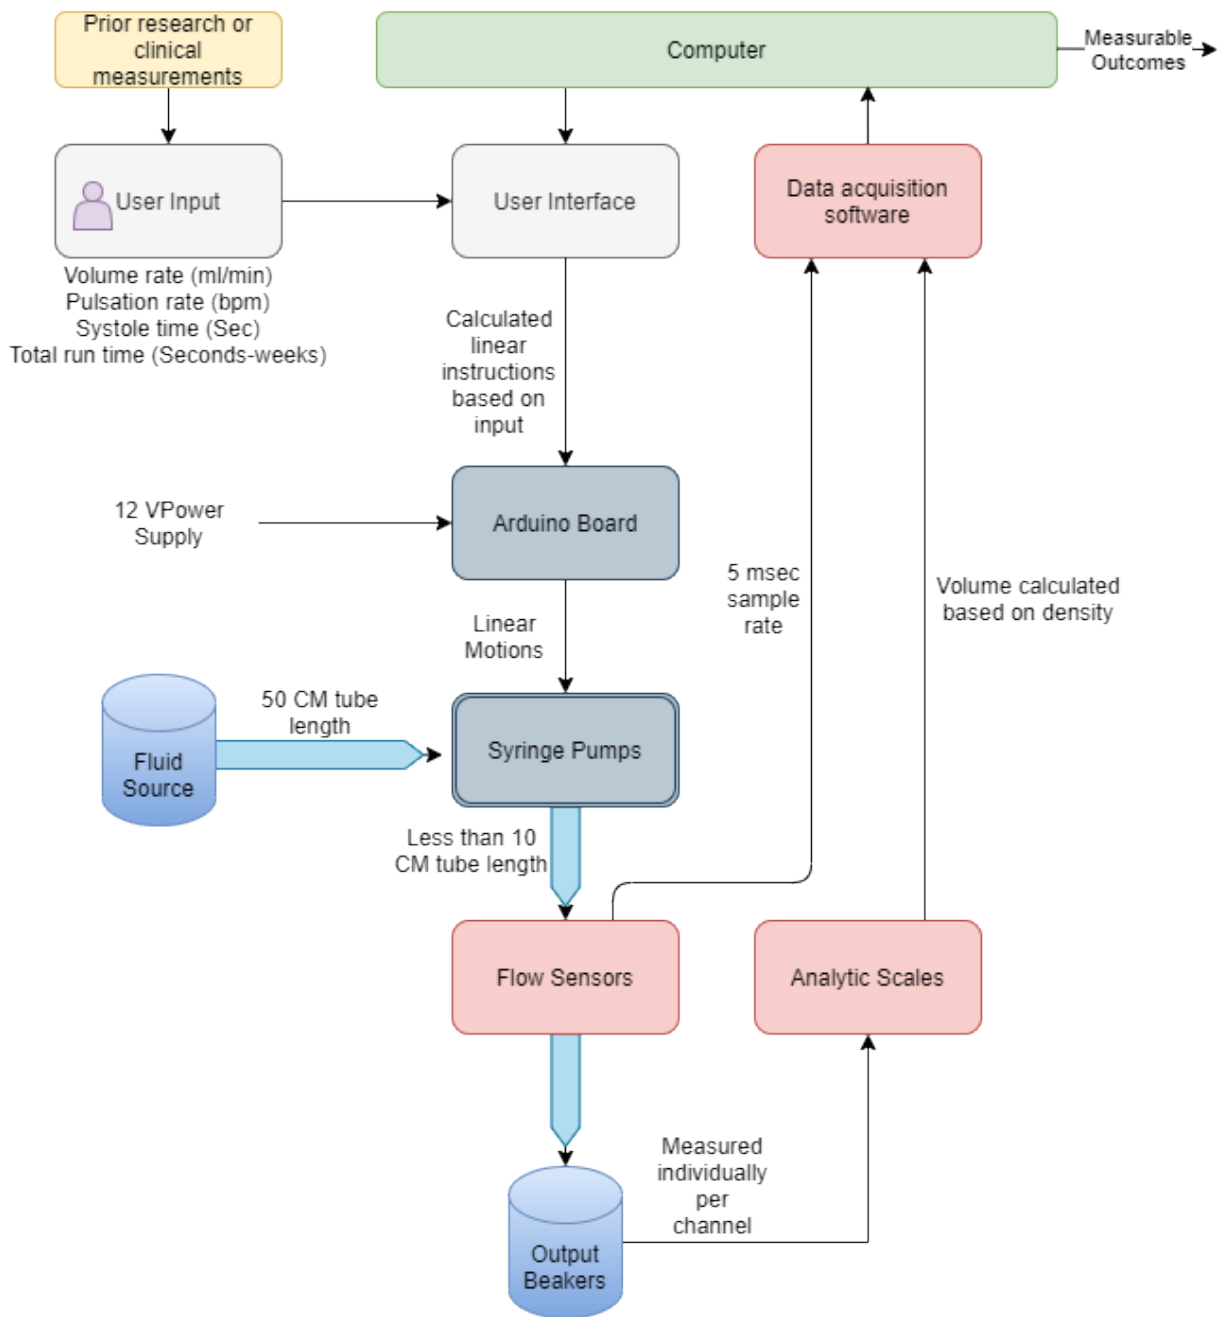

397

398 *Figure 1. Schematic diagram illustrating the flow of information and fluids from user input to*  
399 *analyzed measurable outcomes*

400

401

402 *Figure 2. Syringe pump unit CAD models on the left. A fully assembled unit with 3D printed*  
403 *parts and other components*



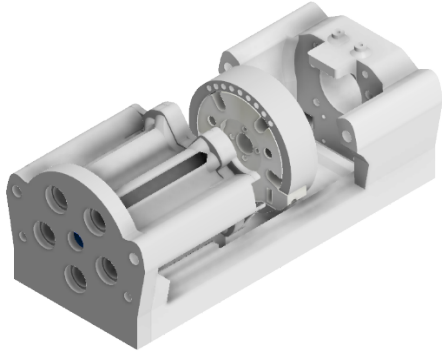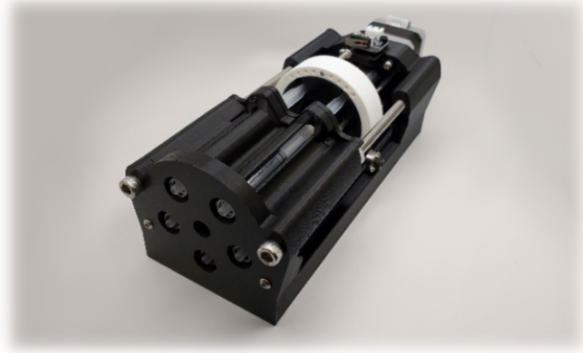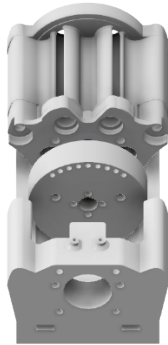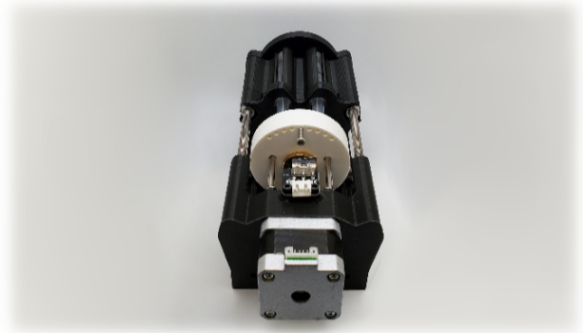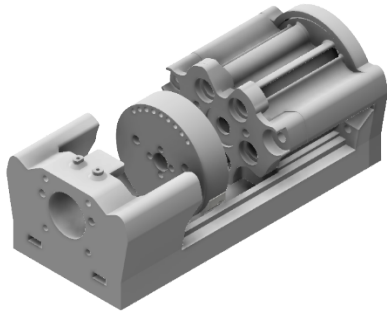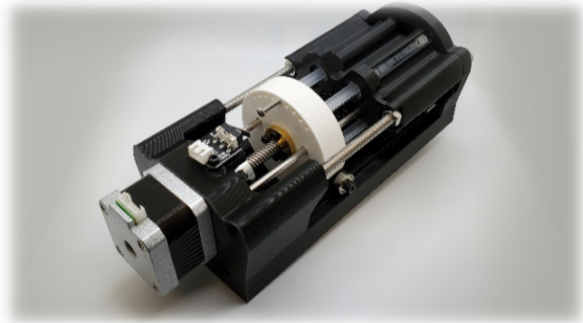

404

405 Table 1. Pump optimal domain and relative to the human physiologic range

| Category                                | Minimum | Maximum | Physiologic Range | within the physiologic domain? |
|-----------------------------------------|---------|---------|-------------------|--------------------------------|
| Pulsation Rate ( $\frac{Beats}{min}$ )  | 1       | 400     | 60-240            | Yes                            |
| Output Volume Rate ( $\frac{ml}{min}$ ) | 0.01    | 5       | 0.21-0.47         | Yes                            |
| Amplitude ( $\frac{ml}{min}$ )          | 0.05    | 55      |                   | Yes                            |

406

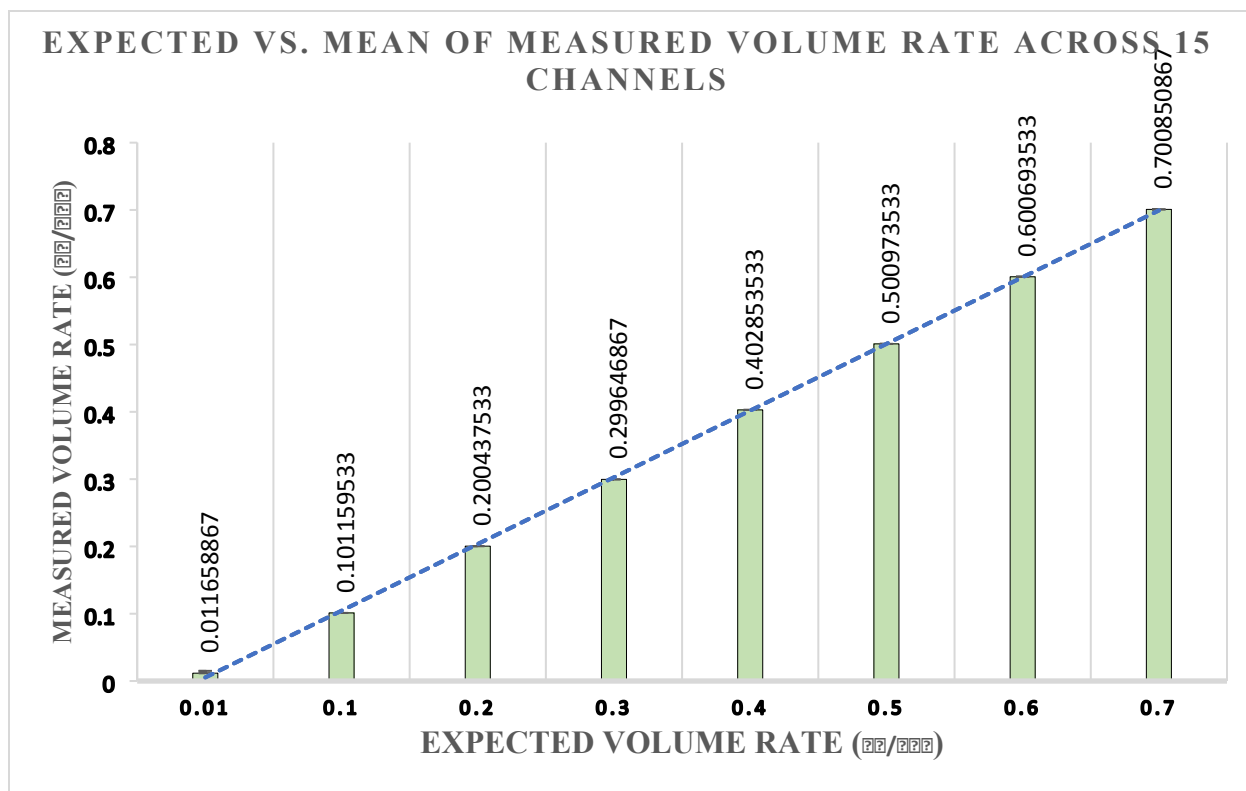

407

408 *Figure 3. Illustrates the expected versus mean of measured volume rate across 15 channels with*  
 409 *a linear function showing a regression*

410

411 Table 2. Volumetric analysis results based on weight measured by analytic balances across the  
 412  $0.01 \frac{ml}{min}$  to  $0.7 \frac{ml}{min}$

| Input                            | Output                                   |                                   |                                    |                                          |                     |
|----------------------------------|------------------------------------------|-----------------------------------|------------------------------------|------------------------------------------|---------------------|
| Volume Rate ( $\frac{ml}{min}$ ) | Mean of 15 channels ( $\frac{ml}{min}$ ) | Lowest Value ( $\frac{ml}{min}$ ) | Highest Value ( $\frac{ml}{min}$ ) | Mean Absolute Error ( $\frac{ml}{min}$ ) | Mean Relative Error |
| 0.01                             | 0.011658867                              | 0.009978                          | 0.013428                           | -0.001658867                             | 16.58867 %          |
| 0.1                              | 0.101159533                              | 0.099528                          | 0.10255                            | -0.001159533                             | 1.15953 %           |
| 0.2                              | 0.200437533                              | 0.19741                           | 0.203108                           | -0.000437533                             | 0.21876 %           |
| 0.3                              | 0.299646867                              | 0.29345                           | 0.303303                           | 0.000353133                              | 0.11771 %           |

|                      |             |         |          |              |                   |
|----------------------|-------------|---------|----------|--------------|-------------------|
| <b>0.4</b>           | 0.402853533 | 0.39777 | 0.406293 | -0.002853533 | 0.71338<br>3<br>% |
| <b>0.5</b>           | 0.500973533 | 0.49599 | 0.506528 | -0.000973533 | 0.19470<br>7<br>% |
| <b>0.6</b>           | 0.600693533 | 0.59529 | 0.605413 | -0.000693533 | 0.11558<br>9<br>% |
| <b>0.7</b>           | 0.700850867 | 0.68987 | 0.706133 | -0.000850867 | 0.12155<br>2<br>% |
| <b>Overall mean:</b> |             |         |          | -0.001034283 | 2.40373<br>9<br>% |

413

414

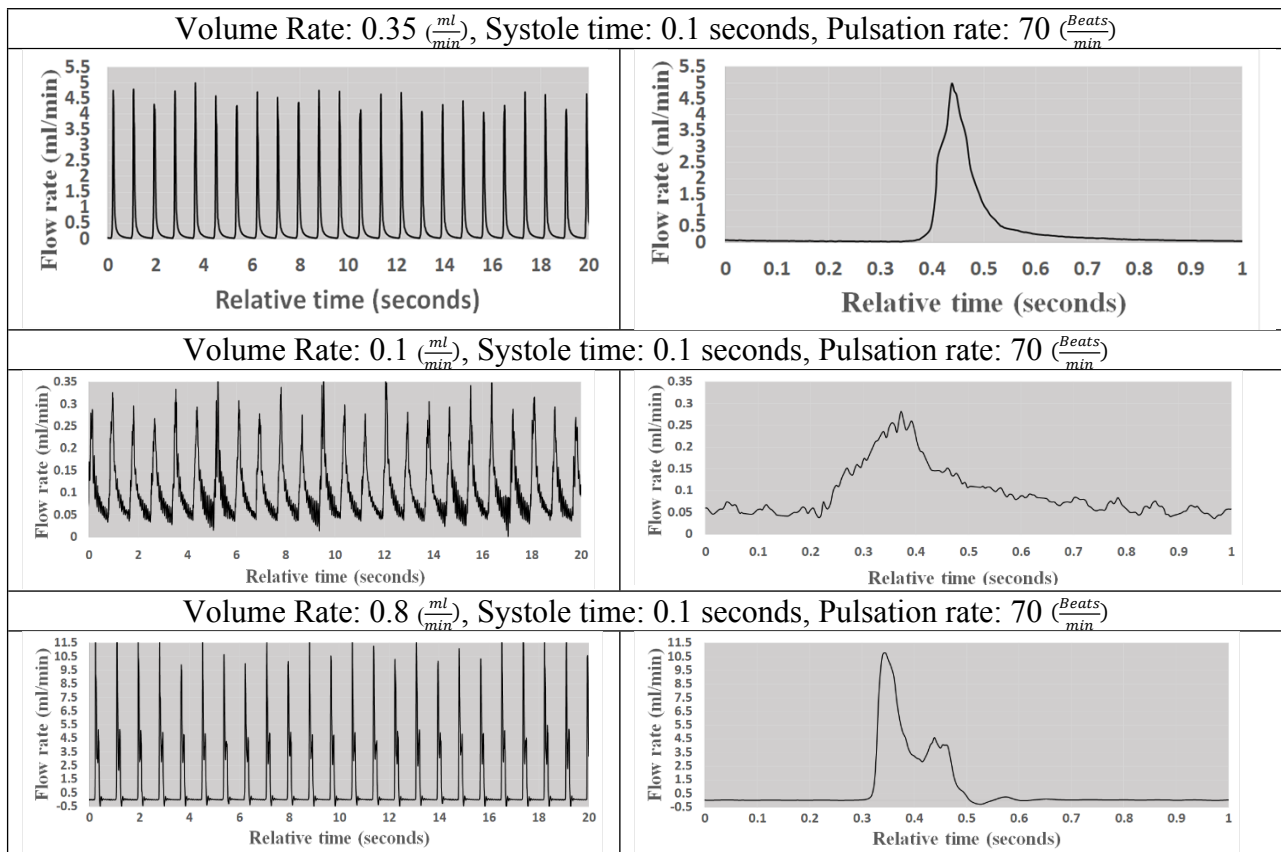

415 *Figure 4. Illustrates the flow pattern at different flow rates while systole time and pulsation rate*  
 416 *are constant*

417

418

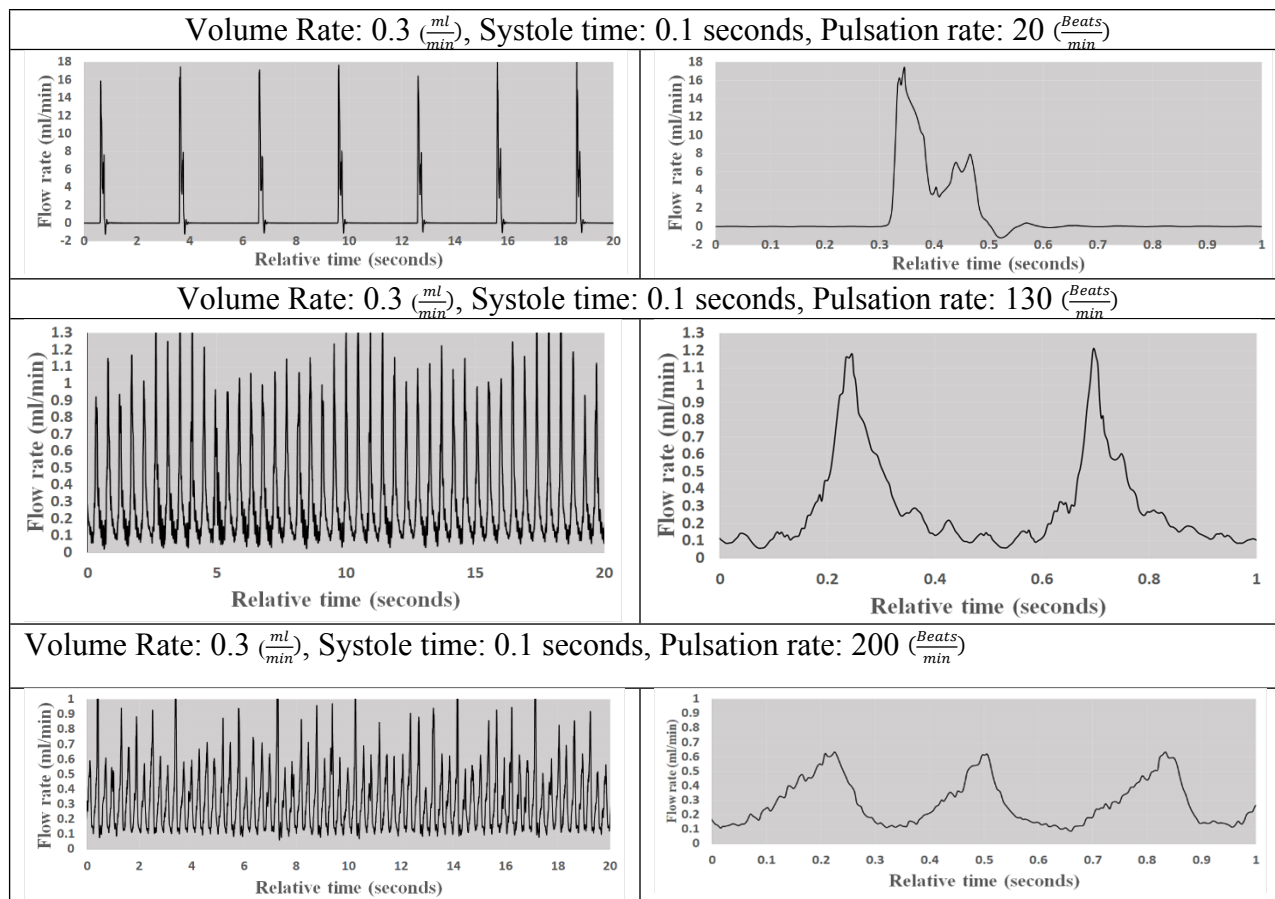

419 *Figure 5. Visual representation of flow pattern at 78,200, and 20 beats per minute while volume*  
420 *rate and systole time remained constant*

421

422

423

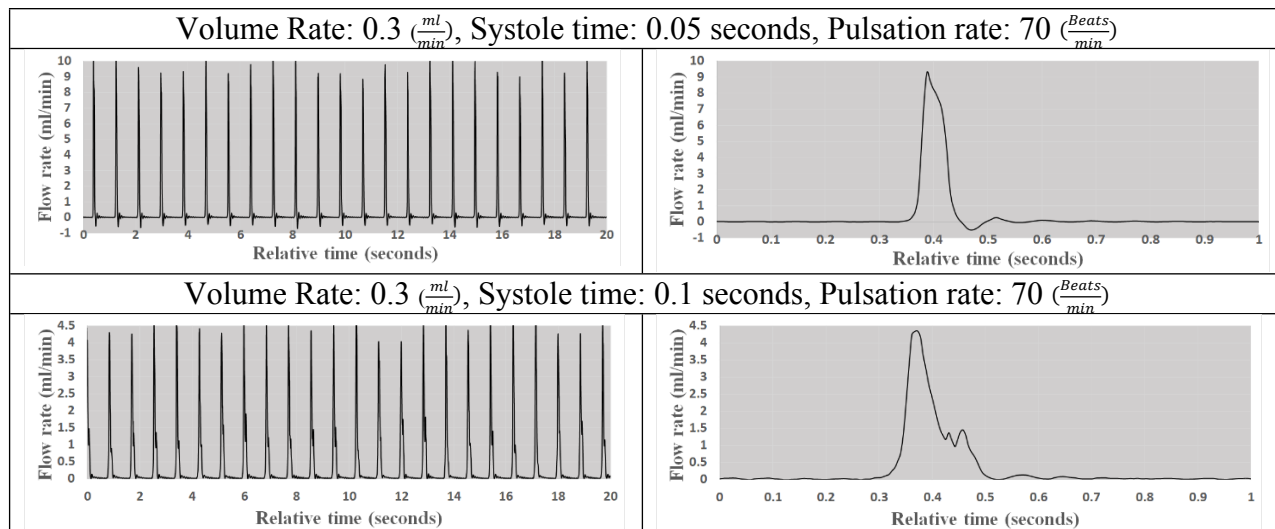

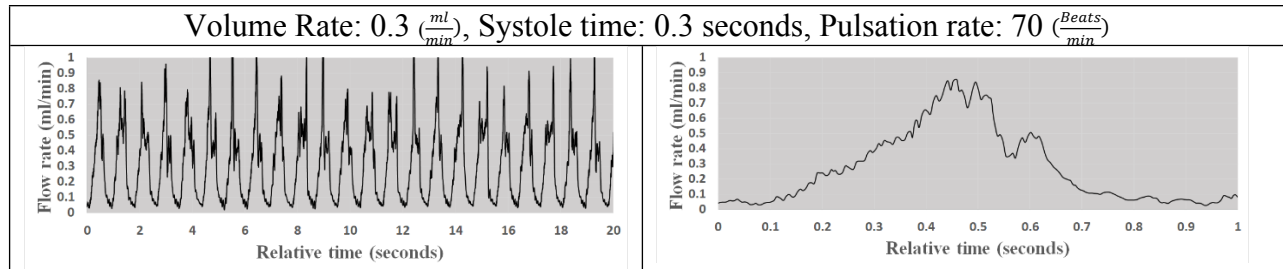

424 *Figure 6. Visual representation of flow pattern at various systole times while heart rate and*  
 425 *volume rate remained constant at  $70 \left(\frac{Beats}{min}\right), 0.3 \left(\frac{ml}{min}\right)$ ,*

426

427 Table 3. Volumetric analysis of pumps running within the mean CSF production rate reported by  
 428 Edsbage et. al [26]

| Input                            | Output                                   |                                   |                                    |                                          |                     |
|----------------------------------|------------------------------------------|-----------------------------------|------------------------------------|------------------------------------------|---------------------|
| Volume Rate ( $\frac{ml}{min}$ ) | Mean of 15 channels ( $\frac{ml}{min}$ ) | Lowest Value ( $\frac{ml}{min}$ ) | Highest Value ( $\frac{ml}{min}$ ) | Mean Absolute Error ( $\frac{ml}{min}$ ) | Mean Relative Error |
| <b>0.21</b>                      | 0.209015533                              | 0.202983                          | 0.211548                           | 0.000984                                 | 0.471002%           |
| <b>0.34</b>                      | 0.345996                                 | 0.33252                           | 0.350533                           | -0.006                                   | 1.733025%           |
| <b>0.47</b>                      | 0.462307                                 | 0.45535                           | 0.467528                           | 0.007693                                 | 1.664075%           |
| <b>Overall mean:</b>             |                                          |                                   |                                    | 0.000892                                 | 1.289367%           |

429

430

431

432

433
